# Supplementary material
Source: publisher site journal article supplement (https://kjim.org/upload/media/kjim-2024-050-Supplementary-Table-1.pdf)
Supplement: Supplementary file 1 [file kjim-2024-050-Supplementary-Table-1.pdf]

**Supplementary Table 1. Variables included in the frailty index**

|                      | Items                                                                                                                                                                                                                                                                                                                                                                                                                                                                                                                                                                                                                                                                                                                                                                        |
|----------------------|------------------------------------------------------------------------------------------------------------------------------------------------------------------------------------------------------------------------------------------------------------------------------------------------------------------------------------------------------------------------------------------------------------------------------------------------------------------------------------------------------------------------------------------------------------------------------------------------------------------------------------------------------------------------------------------------------------------------------------------------------------------------------|
| Comorbidities        | <ol style="list-style-type: none"> <li>1. Anemia</li> <li>2. Arthritis</li> <li>3. Asthma</li> <li>4. Cancer</li> <li>5. Cardiovascular disease (myocardial infarction, angina)</li> <li>6. Cataract</li> <li>7. Chronic obstructive pulmonary disease</li> <li>8. Depression</li> <li>9. Diabetes</li> <li>10. Dyslipidemia</li> <li>11. Hypertension</li> <li>12. Stroke</li> </ol>                                                                                                                                                                                                                                                                                                                                                                                        |
| Functional abilities | <ol style="list-style-type: none"> <li>1. Activities of daily living limitation</li> <li>2. Inactivity</li> <li>3. Difficulty in exercise</li> <li>4. Difficulty in self-care</li> <li>5. Difficulty in social activity</li> <li>6. Hearing impairment</li> <li>7. Chewing difficulty</li> </ol>                                                                                                                                                                                                                                                                                                                                                                                                                                                                             |
| Signs and symptoms   | <ol style="list-style-type: none"> <li>1. Anxiety</li> <li>2. Pain or discomfort</li> <li>3. Stress</li> <li>4. Suicidal ideation</li> <li>5. Weight loss (weight loss of 3 kg or more in the prior year)</li> </ol>                                                                                                                                                                                                                                                                                                                                                                                                                                                                                                                                                         |
| Laboratory values    | <ol style="list-style-type: none"> <li>1. Systolic blood pressure (&gt; 160 mmHg or &lt; 90 mmHg)</li> <li>2. Diastolic blood pressure (&gt; 90 mmHg or &lt; 50 mmHg)</li> <li>3. Hemoglobin (&gt; 18 g/dL or &lt; 11 g/dL)</li> <li>4. Blood urea nitrogen (&gt; 20 mg/dL or &lt; 7 mg/dL)</li> <li>5. Creatinine (&gt; 1.2 mg/dL or &lt; 0.6 mg/dL)</li> <li>6. Fasting glucose (&gt; 250 mg/dL or &lt; 90 mg/dL)</li> <li>7. Fasting cholesterol (total cholesterol &gt; 270 mg/dL or &lt; 135 mg/dL)</li> <li>8. High-density lipoprotein cholesterol (&lt; 40 mg/dL)</li> <li>9. Triglyceride (&gt; 200 mg/dL)</li> <li>10. Proteinuria (urine dipstick test positive)</li> <li>11. Heart rate irregularity</li> <li>12. Pulmonary function test abnormality</li> </ol> |
| Additional items     | <ol style="list-style-type: none"> <li>1. Body mass index (&lt; 18.5 kg/m<sup>2</sup> or &gt; 25 kg/m<sup>2</sup>)</li> <li>2. Current smoking</li> </ol>                                                                                                                                                                                                                                                                                                                                                                                                                                                                                                                                                                                                                    |
